# Supplementary material
Source: MDPI journal article supplement (https://www.mdpi.com/2073-4395/6/4/47)
Supplement: s1 [file s1]

Supplementary Materials: Weed Suppression and Performance of Grain Legumes Following an Irrigated Rice Crop in Southern Australia

KM Shamsul Haque, Brian Dunn, Geoff Beecher, Philip L. Eberbach, Mike Dyall-Smith, Julia A. Howitt and Leslie A. Weston

**Figure S1.** Daily temperature (**upper** panel) and rainfall (**lower** panel) records for the experimental field during rice and post-rice pulse crop growth. Rice harvest time and the crop sowing dates are indicated by downward pointing arrows. Long-term average of total rainfall (**solid black** line) and the average total rainfall for the previous 5 years (2007–2011, dashed line) are presented in the lower panel.

**Table S1.** Timing of experimental activities performed before, during and after crop establishment.

| **Rice Cultivation-Phase** | | **Legume Cultivation-Phase** | |
| --- | --- | --- | --- |
| **Events/Activity** | **Calender Date** | **Events/Activity** | **Calender Date** |
| Rice sowing | 16 October 2012 | 1st sowing date (S1) * | 30 April 2013 |
| First flush irrigation on | 16 October 2012 | 2nd sowing date (S2) * | 16 May 2013 |
| Second flush irrigation | 24 October 2012 | 3rd sowing date (S3) * | 21 June 2013 |
| Drainage of all water | 11 March 2013 | Harvesting of S1 field pea | 30 October 2013 |
| Rice harvest | 26 March 2013 | Harvesting * of S2 crops | 22 November 2013 |
| Stubble mulching | 10 April 2013 | Harvesting * of S3 crops | 29 November 2013 |
| Stubble burning | 14 April 2013 |  |  |

* Field pea and faba bean.

**Table S2.** Assessment of of seed germination and purity analysis in seed utilised for field establishment of crops.

| **Crop and Cultivar** | **Count Days** | **Seedling Count** | | | **Germination 1** | **Pure Seed 2** | **Inert Matter 3** | **1000-Seed Weight (g)** |
| --- | --- | --- | --- | --- | --- | --- | --- | --- |
| **Abnormal** | **Hard** | **Dead** |
| Field Pea, cv. Aura | 15 | 9 | 0 | 1 | 90% | 99.6% | 0.4% | 224.7 |
| Faba bean Pea, cv. Nura | 8 | 8 | 3 | 0 | 89% | 99.7% | 0.3% | 553.5 |

1 = germination test, temperature maintained at 20 °C; 2 = working sample weight 908 grams and 742 grams for field pea and faba bean, respectively; 3 = working sample weight of 1110 kg and 747 kg for field pea and faba bean, respectively. Test performed by Futari Grain Technology Service, Narrabri, NSW 2390. Test Reference number N78-1327, Lab number 31754, Dated 3.4.2013.
